# Supplementary material
Source: Springer Nature journal article supplement (https://www.springermedizin.de/resource/supplementary/12889_2008_1139_MOESM3_ESM.pdf/9502536)
Supplement: MOESM3 [file 9502536]

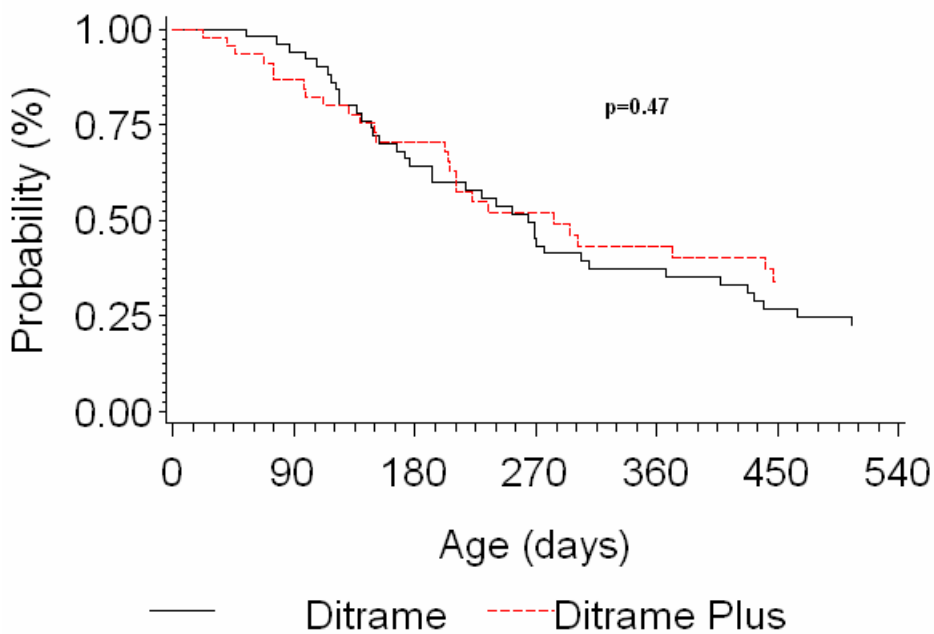

| Age (days)                                   | 6-week      | 3-month               | 6-month               | 9-month               | 12-month              | 18-month              |
|----------------------------------------------|-------------|-----------------------|-----------------------|-----------------------|-----------------------|-----------------------|
| <b>Children at risk (n)</b>                  |             |                       |                       |                       |                       |                       |
| DITRAME                                      | 53          | 48                    | 32                    | 21                    | 18                    | 11                    |
| DITRAME-PLUS                                 | 45          | 39                    | 27                    | 18                    | 15                    | 11                    |
| <b>Cumulative SE (n)</b>                     |             |                       |                       |                       |                       |                       |
| DITRAME                                      | 0           | 3                     | 18                    | 28                    | 31                    | 38                    |
| DITRAME-PLUS                                 | 0           | 5                     | 11                    | 18                    | 20                    | 26                    |
| <b>Cumulative probability of SE (95% CI)</b> |             |                       |                       |                       |                       |                       |
| DITRAME                                      | 0.00<br>(-) | 0.06<br>(0.00 - 0.12) | 0.36<br>(0.23 - 0.49) | 0.56<br>(0.43 - 0.70) | 0.63<br>(0.49 - 0.76) | 0.77<br>(0.65 - 0.89) |
| DITRAME-PLUS                                 | 0.00<br>(-) | 0.13<br>(0.03 - 0.23) | 0.29<br>(0.16 - 0.43) | 0.48<br>(0.32 - 0.63) | 0.56<br>(0.41 - 0.72) | 0.66<br>(0.50 - 0.81) |

SE: Severe event: death or hospitalization; 95% CI: 95% confidence interval.
